# FOCUS

THE JOURNAL OF LIFELONG LEARNING IN PSYCHIATRY



## *Eating Disorders*

*Guest Editor: Katherine A. Halmi, M.D.*

### IN CLINICAL SYNTHESIS:

Evidence-Based Psychotherapy for Eating Disorders

*Hunna J. Watson, Ph.D.*

*Cynthia M. Bulik, Ph.D.*

Pharmacotherapy and Physiological Intervention for Eating Disorders

*Katherine A. Halmi, M.D.*

Key Factors in Diagnosing and Treating Adolescent Eating Disorders

*James Lock, M.D., Ph.D.*

Guideline Watch (August 2012): American Psychiatric Association  
Practice Guideline for the Treatment of Patients  
With Eating Disorders, 3rd Edition

*Joel Yager, M.D.*

*Michael J. Devlin, M.D.*

*Katherine A. Halmi, M.D.*

*David B. Herzog, M.D.*

*James E. Mitchell III, M.D.*

*Pauline Powers, M.D.*

*Kathryn J. Zerbe, M.D.*

AND INFLUENTIAL PUBLICATIONS...
